# Supplementary material for: Preparation of uniform-sized colloidosomes based on chitosan-coated alginate particles and its application for oral insulin delivery
Source: Royal Society of Chemistry journal article supplement (doi:10.1039/c4tb01259c), 2014-09-04
Supplement: c4tb01259c1.pdf [file c4tb01259c1.pdf]

SUPPORTING INFORMATION

Preparation of Uniform-Sized Colloidosome Based on Chitosan-Coated Alginate Particles and its Application for Oral Insulin Delivery

Fangfang Nan<sup>a,c,d</sup>, Jie Wu<sup>a,d</sup>, Feng Qi<sup>a,c</sup>, Qingze Fan<sup>a,c</sup>, Guanghui Ma<sup>a,\*</sup>, and To Ngai<sup>b,\*</sup>

<sup>a</sup> State Key Laboratory of Biochemical Engineering, Key Laboratory of Biopharmaceutical Production and Formulation Engineering, Institute of Process Engineering, Chinese Academy of Sciences, Beijing, 100190, PR China

<sup>b</sup> Department of Chemistry, The Chinese University of Hong Kong, Shatin, N.T., Hong Kong

<sup>c</sup> University of Chinese Academy of Sciences, Beijing, 100049, PR China

<sup>d</sup> Authors contributed equally to this work

\*Corresponding author:

Guanghui Ma: Tel. /fax: +86 10 82627072. E-mail address: [ghma@home.ipe.ac.cn](mailto:ghma@home.ipe.ac.cn)

To Ngai: Tel.: +852 3943 1222; fax: +852 2603 5057. E-mail address: [tongai@cuhk.edu.hk](mailto:tongai@cuhk.edu.hk)

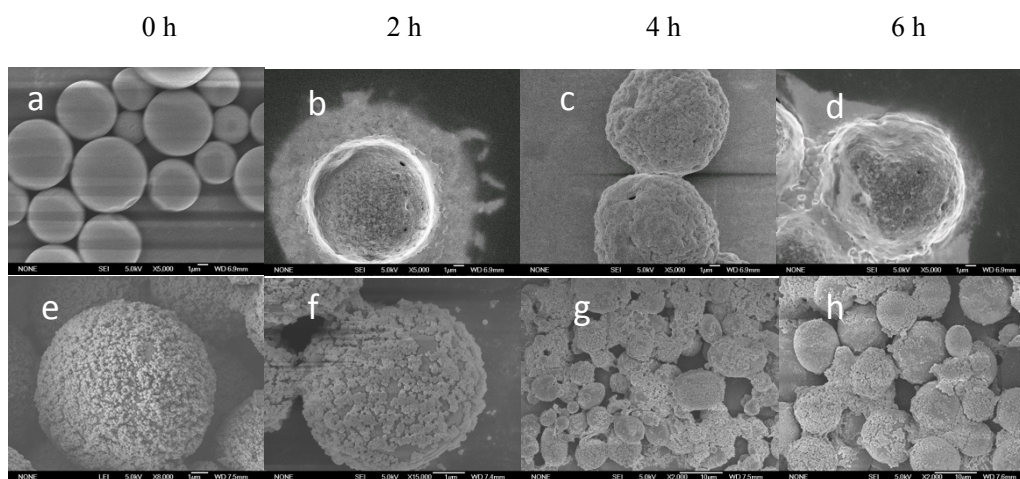

Fig. S1 SEM images of PLGA-M (a, b, c, d) 和 PLGA-P-M (e, f, g, h) in vitro of release.
